## Action inhibition revisited: Stopping is not faster than going

Yue Du<sup>1\*</sup>, Alexander D. Forrence<sup>1,2</sup>, Delaney M. Metcalf<sup>1,3</sup>, Adrian M. Haith<sup>1</sup>

<sup>1</sup>Department of Neurology, Johns Hopkins University, Baltimore, MD, USA

<sup>2</sup>Department of Psychology, Yale University, New Haven, CT, USA

<sup>3</sup>School of Medicine, University of Georgia, Augusta, GA, USA

\*Corresponding author: ydu27@jhmi.edu

### Abstract

We often need to swiftly abort a prepared response at the last moment before it is initiated. Our ability to abort a planned response is thought to be a fundamental facet of action control, which is distinguished by being more rapid than initiating an action, and has been suggested to be enabled by specialized neural mechanisms. This narrative has, however, largely been established based on experiments in which there is much greater urgency to abort an action than there is to generate an action. Here, we demonstrate that, under conditions of matched urgency, the speed at which participants are able to abort an action is comparable to the speed at which they can initiate an action. Our results challenge the prevailing view that reactive stopping behaviors have a privileged status over action initiation. Instead, action initiation may be systematically delayed to allow time to abort an action if needed. We propose that action cancellation and action initiation may reflect two opposing states of a single process supporting a decision about whether to act or not.

**Keywords: Action inhibition, Stop-signal task, Race model, Action initiation**

### Introduction

The ability to cancel or inhibit a voluntary action moment before it is initiated is widely considered to be a fundamental component of action control (Logan and Cowan, 1984). For instance, a pedestrian about to step into the street must swiftly abort this act if a fast car suddenly approaches. In the laboratory, reactive action inhibition of this kind has primarily been studied using the *stop-signal task*, in which people are asked to respond to an imperative “go” stimulus as quickly as possible with a button press (or other action) but must cancel this response in the event of a “stop” signal. Using such tasks, it has been found that people are able to cancel an intended response even if the stop signal is received after the “go” cue is presented (Logan and Cowan, 1984; Verbruggen et al., 2019). The time required to successfully cancel the initiation of a response, therefore, seems to be shorter than the time needed to initiate a response (Slater-Hammel, 1960). This observation has prompted the suggestion that reactive action inhibition may be a privileged component of action control, potentially supported by a specialized mechanism through the prefrontal-cortex – basal-ganglia hyperdirect pathway that acts as an “emergency brake” to prevent

41 unwanted responses from being initiated (Aron et al., 2014; Dunovan et al., 2015; Hannah and  
42 Aron, 2021; Wiecki and Frank, 2013).

43 The idea that stopping an action is inherently faster than generating one depends critically  
44 on the assumption that the reaction time for a movement represents the minimum possible time at  
45 which it could be initiated. Recent findings have, however, shown that this assumption is not true.  
46 Instead, movements seem to be initiated at a delay of up to 100 ms after they are prepared and  
47 ready to execute (Carlsen et al., 2004; Haith et al., 2016; Valls-Solé et al., 1995). Moreover, the  
48 size of the delay between preparation and initiation can be influenced by the urgency of the task  
49 (Haith et al., 2016). In stop-signal tasks, the delay in action initiation may be further exacerbated,  
50 with reaction times averaging up to around 450 ms (e.g., Leunissen et al., 2017) – much longer  
51 than the typical reactions times of 200-250 ms to respond to a go cue (Luce, 1991; Welford, 1980).  
52 By contrast, the need to cancel a response has high urgency because it has to be done before the  
53 response is initiated and the time needed to abort a response ranges from 180 ms to 270 ms (He et  
54 al., 2021; Leunissen et al., 2017; Logan and Cowan, 1984; Matzke et al., 2021). In the stop-signal  
55 paradigm, therefore, there is a marked asymmetry in urgency between the requirements to initiate  
56 a response and the potential requirement to cancel one. This asymmetry could account for action  
57 inhibition seeming to be much faster than action initiation.

58 Here, we performed an experiment to more fairly compare the speed at which participants  
59 could initiate an action or cancel an intended action by measuring them under separate conditions  
60 in which the urgency was matched as closely as possible. We adopted a “timed-response” approach  
61 in which participants were trained to always respond at a prescribed time in each trial (Haith et al.,  
62 2016). By occasionally and unexpectedly switching the required behavior, either from requiring a  
63 response at the prescribed time to requiring no response (Coxon et al., 2006; Leunissen et al., 2017;  
64 Slater-Hammel, 1960), or from requiring no response to requiring a response, we were able to  
65 establish the time course over which participants were able to inhibit or initiate responses and  
66 directly compare them.

## 67 **Results**

68 Participants viewed a circle moving vertically downward to cross a horizontal line (Fig. 1).  
69 They were instructed to press a button when the circle overlapped the target line if the circle was  
70 white, but do nothing if the circle was black (the actual meaning of the two colors was  
71 counterbalanced across participants). The initial color of the circle varied from block to block so

72 that participants were either initially cued to respond, or to not respond. In each case, however, the  
73 color of the circle changed in a subset of trials (30%) at a random time (50-500ms) before hitting  
74 the target line, so that participants needed to either rapidly abort an initially prepared response,  
75 similar to conventional stopping paradigms (Slater-Hammel, 1960; Verbruggen et al., 2019)  
76 (Response-to-No-Response condition; R-to-NR), or they had to rapidly initiate a response that they  
77 were not initially intending to (No-Response-to-Response; NR-to-R).  
78

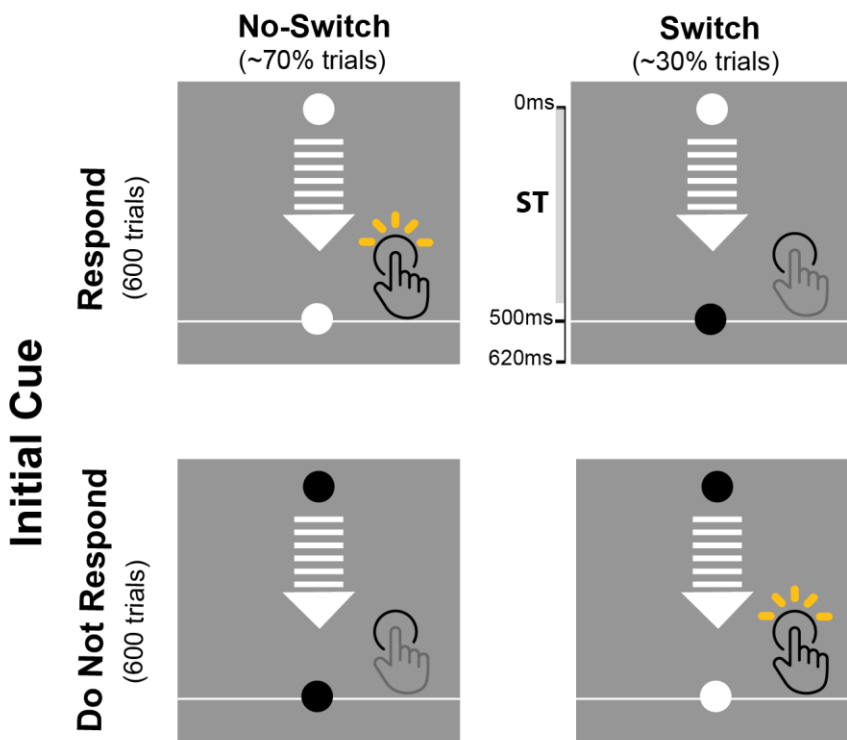

79  
80 **Fig. 1. Experiment procedure.** Participants were asked to either press a key or do nothing when a moving  
81 circle reached the target line. Whether or not a response was required in a given trial depended on the color of the  
82 circle (e.g., white = respond; black = do not respond). The actual circle color was counterbalanced across participants,  
83 controlling for the potential perceptual differences of black and white colors. The circle always started with the same  
84 same color within each block of 100 trials. In ~70% of trials, the circle remained the same color throughout. However, in  
85 another ~30% of trials, the circle changed color before it hit the target line, forcing participants to cancel a preplanned  
86 response or to initiate a response when the circle crossed the line. By manipulating the time at which the circle color  
87 changed in each condition, we were able to compare people's ability to stop themselves from generating a planned  
88 response ("R-to-NR" condition; upper panel) to the ability to rapidly generate a response ("NR-to-R" condition; lower  
89 panel). Participants completed 12 blocks of 100 trials, generating 204 switch trials in each condition.

90

91 The performance of one exemplar participant is shown in Fig. 2B. In switch trials of the  
92 R-to-NR condition, when the time available to abort an impending response (the *forced response*  
93 *time* or *forced RT*; Fig. 2A; Methods) was very short ( $< 100\text{ms}$ ), this participant almost always  
94 failed to abort their prepared response. However, at longer RTs ( $> 300\text{ms}$ ), this participant was  
95 able to correctly cancel the response in almost all trials. At intermediate RTs, the participant was  
96 sometimes successful and sometimes unsuccessful in canceling their response. Similar but  
97 complementary behavior was observed in the NR-to-R switch trials. This participant failed to  
98 initiate a timely response if the circle changed color shortly before it crossed the line. When  
99 allowed longer time to react to the color change, however, they always correctly generated a  
100 response.

101 From this raw response data, we constructed a speed–accuracy trade-off for each condition  
102 (R-to-NR and NR-to-R), based on a 50 ms sliding window on the allowed RT, which describes the  
103 probability of correctly aborting a response (R-to-NR) or the probability of generating a successful  
104 response (NR-to-R) as a function of allowed RT (Fig. 2C). For the exemplar participant in Fig. 2B,  
105 the centers of the speed–accuracy trade-off function, representing the average time required to  
106 either cancel (R-to-NR condition) or initiate (NR-to-R) a response, were both located around 280  
107 ms. The speed–accuracy trade-offs averaged across all participants ( $n = 35$  out of 36; Methods;  
108 Figs. S1 and S2) showed the same pattern (Fig. 2D; Dashed lines), indicating that equal amounts  
109 of time were required to initiate a response and to cancel the initiation of a response.

110 To quantitatively estimate how fast participants could cancel a response in the R-to-NR  
111 condition, we considered a simple model in which we assumed that the cancellation of a response  
112 could be thought of as a discrete event occurring at a random time  $T_{NR} \sim \mathcal{N}(\mu_{NR}, \sigma_{NR}^2)$  after the  
113 circle changed color (Haith et al., 2016). On a given trial, if the time needed to cancel a response  
114 ( $T_{NR}$ ) was shorter than the allowed RT, participants would successfully avoid generating a  
115 response. But, if the required time,  $T_{NR}$ , was longer than the allowed RT, participants would fail  
116 to cancel the impending response. This led to a predicted probability of being correct that increased  
117 smoothly as a function of allowed RT, as observed in the data. An analogous model was applied  
118 to the NR-to-R condition. In this case, the decision to initiate a response was assumed to be made  
119 at a random time  $T_R \sim \mathcal{N}(\mu_R, \sigma_R^2)$  after the circle changed color and, on a given trial, they would  
120 succeed at correctly generating the response at the right time only if  $T_R$  is shorter than the allowed

121 RT on that trial. Thus,  $\mu_{NR}$  and  $\mu_R$  represented the average times required either to withhold a  
122 movement or initiate a movement, respectively.

123 We fitted these models to each participants' data via maximum likelihood estimation,  
124 yielding model fits that closely matched the empirical data (Fig. 2D; Solid lines). By comparing  
125 the estimates of  $\mu_{NR}$  to  $\mu_R$  across participants, we found that the time required to cancel the  
126 initiation of an impending response ( $\mu_{NR}$ : 294.5 ms  $\pm$  28.3 ms; mean  $\pm$  s.d.) and the time required  
127 to initiate a response ( $\mu_R$ : 289.0 ms  $\pm$  24.4 ms; mean  $\pm$  s.d.) were not significantly different from  
128 one another ( $\mu_{NR} - \mu_R$ : 5.5 ms  $\pm$  24.4 ms, Cohen's d = 0.207,  $t_{34} = 1.34$ , paired t-test,  $p = 0.19$ ,  
129 95% CI: [-2.8ms, 13.9ms]; Fig. 2E) and they were also highly correlated ( $\rho = 0.58$ ,  $p < 0.001$ ). The  
130 equivalence and noninferiority test demonstrated that these two speeds were statistically equivalent  
131 ( $p_{lower} < 0.001$ ;  $p_{upper} = 0.004$ , 90% CI: [-1.5ms, 12.5ms]). Thus, when we compared response  
132 initiation and cancellation under experimental conditions that were as closely matched as possible,  
133 we found no evidence to support the assertion that cancelling a response is faster than generating  
134 one.

135 Because  $\mu_{NR}$  and  $\mu_R$  represent the RT at which performance accuracy reaches the center  
136 of the speed-accuracy trade-off function, their estimates were sensitive to exactly how we defined  
137 whether a trial was performed correctly or not. In our initial analysis, a late response (if the circle  
138 was below the target line without overlapping it at the time the response was made) of an NR-to-  
139 R trial was considered as incorrect, whereas in R-to-NR trials, it was impossible to distinguish  
140 between trials in which a response was cancelled at the correct time, and trials in which a response  
141 was delayed before being cancelled. This unavoidably imposed a stronger requirement of timing  
142 precision on initiating a response than cancelling a response (asymptotic accuracy:  $\beta = 0.89 \pm 0.06$   
143 vs.  $\beta = 0.96 \pm 0.05$ ;  $t_{34} = -5.26$ , paired t-test,  $p < 0.0001$ , 95% CI: [-0.09, -0.04]; Methods). After  
144 relaxing the timing requirement for considering a response as being correctly initiated, which  
145 matched the asymptotic accuracies between conditions ( $0.94 \pm 0.06$  vs.  $0.96 \pm 0.05$ ;  $t_{34} = -1.9$ ,  
146 paired t-test,  $p = 0.07$ , 95% CI: [-0.04ms, 0.01ms]), we found that the updated  $\mu_R$  (286.3 ms  $\pm$   
147 23.6 ms) was only 2.7 ms different from the original analysis and was only 8.2 ms shorter than  
148  $\mu_{NR}$  ( $\mu_{NR} - \mu_R$ : 8.2 ms  $\pm$  23.5 ms, Cohen's d = 0.31,  $t_{34} = 2.06$ , paired t-test,  $p = 0.047$ , 95% CI:  
149 [0.0ms, 16.3ms], power = 0.5; Fig. S3). In addition, the difference between  $\mu_{NR}$  and the updated  
150  $\mu_R$  fell within the equivalence bound between -16.5 ms and 16.5 ms ( $p_{lower} < 0.001$ ;  $p_{upper} = 0.02$ ,

151 90% CI: [1.5ms, 14.9ms]). Our conclusion about action cancellation and initiation having a similar  
 152 time course was not strongly affected by late responses.

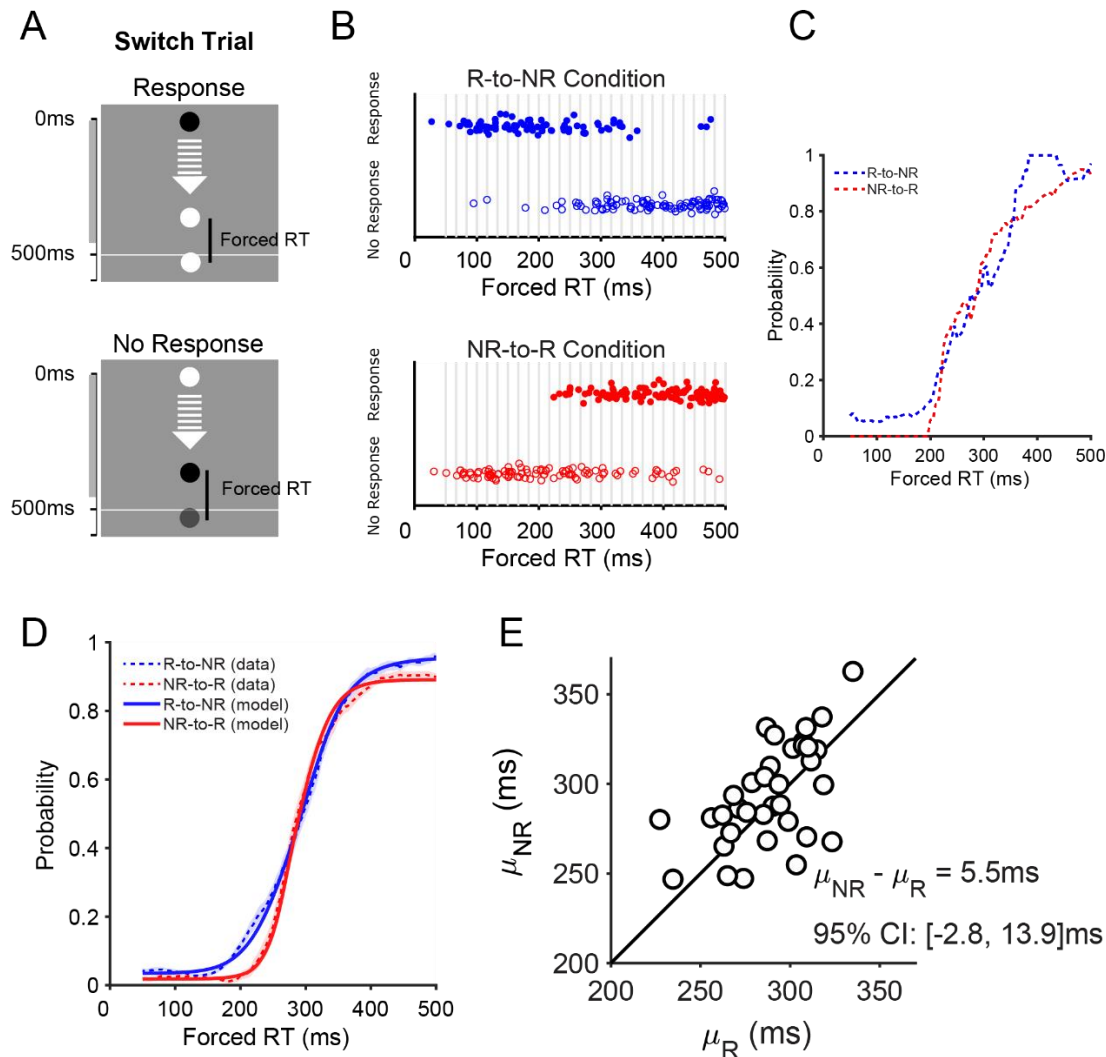

153  
 154 **Fig. 2. Cancelling an impending response is not faster than initiating one.** A) The forced RT was quantified as the  
 155 time elapsed from color change to the time of the button press when participants generated a response. When no  
 156 response occurred, the forced RT was approximated as the time interval between the color change to the typical time  
 157 of button presses in comparable trials (see Methods for more details). B) Behavior of one exemplar participant. In  
 158 trials in which only a very short forced RT was allowed, this participant consistently made the wrong choice as to  
 159 whether to respond or not. When a longer forced RT was allowed, this participant was able to consistently make the  
 160 correct choice to respond or not. Vertical jitter was added to allow individual data points to be seen more easily. C)  
 161 The raw data were used to construct speed-accuracy trade-offs, showing the probability of a correct choice as a  
 162 function of forced RT. D) Mean speed-accuracy trade-offs for each condition across all participants (dashed lines)  
 163 were well captured by a computational model (solid lines) in which we assumed that the decision to respond or not  
 164 could be thought of as a discrete event occurring at a random time  $T \sim \mathcal{N}(\mu, \sigma^2)$  after the circle changes color. E) We

165 used this model to estimate the average time needed to cancel an intended response  $\mu_{NR}$  in R-to-NR condition and the  
166 average time to initiate a response  $\mu_R$  in the NR-to-R condition. Across all participants,  $\mu_{NR}$  (294.5 ms  $\pm$  28.3 ms;  
167 mean  $\pm$  s.d.) was not significantly different from  $\mu_R$  (289.0 ms  $\pm$  24.4 ms; mean  $\pm$  s.d.).

168 Similar to other stop-signal tasks, the preceding analyses relied on designating a surrogate  
169 RT for trials where a response is missing. To eschew the need to devise a proxy RT when  
170 participants failed to respond, we focused only on trials in which a response was generated and  
171 analyzed the actual time of responses (i.e., the time at which a response is made after the trial onset)  
172 as a function of the intended forced RT (i.e., time interval between color change and the target line)  
173 in the NR-to-R condition. We observed that responses were generated around the target line when  
174 the intended RT time was long (e.g.,  $> 350$  ms), but tended to be made very late when the intended  
175 RT was short (e.g.,  $< 200$  ms). Participants seemed to time their responses (i.e., by delaying when  
176 to initiate the response) given long intended RT and switch to performing the task in a reactive  
177 mode, responding as soon as possible after the color change, even if this was too late. We assumed  
178 that the timing of this switch strategy coincided with the minimum time at which participants could  
179 successfully initiate a movement on time. To estimate the timing of this switch  $\mu_T$ , we fit a simple  
180 model of the timing of participants' responses as a function of intended forced RT (Methods). The  
181 model comprised two linear components: one to represent accurate timing at longer RTs, and one  
182 to represent delayed, reactive timing at very short RTs (Fig. 4A; Solid light blue line). The  
183 estimates of  $\mu_T$  (302.3 ms  $\pm$  39.0 ms; mean  $\pm$  s.d.) were in a close agreement with the original  
184 estimate of  $\mu_R$  based on approximated RT ( $\rho = 0.65$ ;  $p < 0.0001$ ) and, importantly, did not differ  
185 significantly from the time that participants needed to withhold a previously intended response,  
186  $\mu_{NR}$  estimated in the R-to-NR condition ( $\mu_{NR} - \mu_T$ : -7.7 ms  $\pm$  37.7 ms, Cohen's  $d = -0.22$ ,  $t_{34} =$   
187 -1.25, paired t-test,  $p = 0.218$ , 95% CI: [-20.3ms, 4.8ms]; Fig. 4C). Results from the equivalence  
188 and noninferiority test confirmed that these two speeds were similar to each other ( $p_{lower} = 0.003$ ;  
189  $p_{upper} < 0.001$ , 90% CI: [-18.4ms, 2.8ms]). This result accords with our initial analysis that  
190 cancelling a response is not faster than initiating a response.

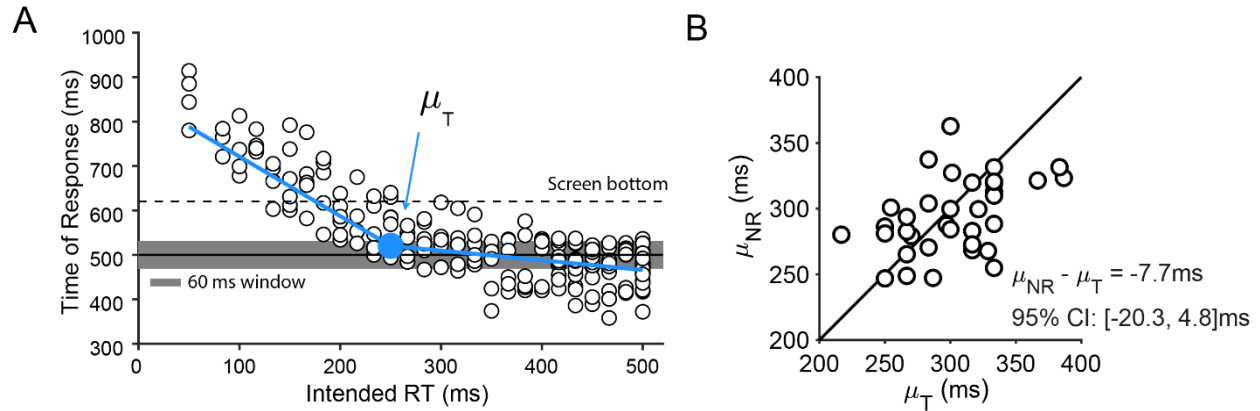

191  
192 **Fig. 3. Alternative analysis based on the pattern of delayed responses.** A) The time of response data as a function  
193 of intended RT from the same exemplar participant as in Fig. 2B. The time of response was measured as the time  
194 interval between trial start and the time at which a response is made. Intended forced RT was the time interval between  
195 color change and the target line. Since this analysis focused only on trials in which a response was actually generated,  
196 it did not rely on approximating unobserved RT. We fitted the time of response data with two linear functions of  
197 intended forced RT, which intersected at  $\mu_T$  – a parameter that represents the minimum forced RT at which an  
198 accurately timed response could still be made. B) Across all participants, the estimates of  $\mu_T$  ( $302.3 \text{ ms} \pm 39.0 \text{ ms}$ ;  
199 mean  $\pm$  s.d.) – the alternative estimate of time required to initiate a response – were not significantly different from  
200  $\mu_{NR}$  ( $294.5 \text{ ms} \pm 28.3 \text{ ms}$ ; mean  $\pm$  s.d.), the original estimate of the time required to cancel a response.

201  
202 **Discussion**

203 By matching experimental conditions as closely as possible between cancelling an  
204 impending action (i.e., “stopping”) and generating an action (i.e., “going”), we found that the time  
205 for these two processes is comparable, both around 290 ms (with a  $\sim 33$  ms delay caused by visual  
206 display, which was not accounted for in our calculations), suggesting that stopping and going can  
207 occur equally rapidly. This result is echoed by previous evidence from two independent research  
208 fields showing that simple reaction time (Luce, 1991; Welford, 1980) and the time to stop an action  
209 (He et al., 2021; Leunissen et al., 2017; Logan and Cowan, 1984; Matzke et al., 2021) are both  
210 around 200 – 250 ms, and both can reduce to around 150 ms triggered by an unexpected event  
211 (Carlsen et al., 2004; Haith et al., 2016; Wessel and Aron, 2017). Our finding questions the  
212 consensus view from previous experimental, computational, and theoretical work that a rapid,  
213 dedicated inhibition mechanism exists to act like an “emergency brake” on response initiation and  
214 prevent an unwanted response to be produced (Aron et al., 2014; Boucher et al., 2007; Dunovan  
215 et al., 2015; Logan and Cowan, 1984; Slater-Hammel, 1960; Verbruggen et al., 2019; Wiecki and  
216 Frank, 2013).



217           If stopping is not any faster than going, how are we ever able to prevent ourselves from  
218 making an unwanted response? One explanation is that response initiation is typically delayed to  
219 allow time to make a decision about whether to act or not. Although delaying is a common strategy  
220 in proactive stopping (Hannah and Aron, 2021), it has not thought to be a relevant factor in reactive  
221 inhibition. However, even in seemingly reactive tasks, reaction times to initiate a movement are  
222 delayed beyond the time of movement preparation by up to 100 ms (Carlsen et al., 2004; Haith et  
223 al., 2016; Valls-Solé et al., 1995). This flexibility in deciding when to initiate a movement is well  
224 aligned with the concept of “freedom for immediacy” – the capacity to decouple our responses to  
225 external stimuli from the appearance of the stimulus itself (Haggard, 2008; Haith et al., 2016). The  
226 systematic delay between preparation (i.e., what to act) and initiation (i.e., when to act) is thought  
227 to exist, at least in part, to avoid the risk of initiating a response before it has been fully prepared.  
228 Likewise, in the context of stopping behaviors considered here, participants may make the decision  
229 to respond quite quickly after seeing the go cue (i.e., whether to act), but may delay initiation of  
230 their response to avoid the risk of initiating a movement that should instead be canceled. Indeed,  
231 reaction times in previous stop-signal tasks are often prolonged (e.g., Leunissen et al., 2017) and  
232 accompanied by delayed motor cortex excitability (Rawji et al., 2022), suggesting that participants  
233 deliberately delay their responses so as to allow time for the movement to be aborted if needed  
234 (Gulberti et al., 2014; Özyurt et al., 2003) and can even flexibly adjust their reaction speed to shift  
235 the balance in favor of responding or stopping behavior (Corneil et al., 2013; Leotti and Wager,  
236 2010).

237           By constraining the decision about when to act as much as possible, we observed  
238 comparable and highly correlated speeds between action cancellation and action initiation,  
239 suggesting that stopping and going may reflect two opposing states of a single process supporting  
240 a whether decision, rather than reflecting two distinct processes. The *whether* decision about acting  
241 or not acting, together with the decision about *when* to act and the decision about *what* to act are  
242 recognized as three independent aspects of action control in self-generated behaviors (Brass and  
243 Haggard, 2008; Haggard, 2008). Recent behavioral and neurophysiological work has established  
244 that, even in reactive tasks, the process of deciding *what* action to take is mechanistically distinct  
245 from the process of deciding *when* to act (Ames et al., 2019; Elsayed et al., 2016; Haith et al., 2016;  
246 Haith and Bestmann, 2020; Kaufman et al., 2016; Lara et al., 2018). Although both the *when* and  
247 *whether* decisions are likely involved in classic stop-signal tasks, it remains unclear whether they

248 are mechanistically dissociable. It also remains to be determined whether changing the decision  
249 about *whether* to act or not requires inhibiting the initial choice or just simply switching from one  
250 another (see also, MacLeod et al., 2003). We suggest that such processes ought to be considered  
251 as bi-directional rather than as a dedicated function of stopping.

252 Behavior in stop-signal tasks is often interpreted through a race between separate “stop”  
253 and “go” processes to reach a threshold (Boucher et al., 2007; Logan and Cowan, 1984). Our  
254 findings raise a question about what mechanisms the “go” process represents. In conventional stop-  
255 signal tasks, the go process starts accumulating earlier upon an early go signal than the stop process.  
256 The stop process, however, with more rapid accumulations, reaches the threshold earlier despite  
257 its later start, reflecting its assumed privileged function over the go process. However, the “go”  
258 process might conflate multiple distinct aspects of action control, namely the decision about  
259 *whether* to respond, *when* to initiate the response, or *what* response to initiate if the task imposes  
260 multiple response choices (e.g., Verbruggen et al., 2019). As we have shown, constraining the  
261 freedom of when to initiate a response as much as possible yielded an equal amount of time  
262 required to cancel an impending action as to generate an action. This result is difficult to be  
263 explained by race models, in which a core assumption is that the “stop” process accumulates faster  
264 than the “go” process. It is also not clear how this model can accommodate tasks in which a  
265 response is required to be made at a pre-determined time. One approach is to model the go process  
266 as evolving with a speed that spans the entire duration between the start of the trial and the pre-  
267 determined response time (Dunovan et al., 2015), but this rather artificially depends on the  
268 experimental setup. In general, the coupling of whether or not an action will occur and the timing  
269 of the action in the race model is at odds with recent findings that movement preparation and  
270 initiation are separable processes, both neurally and behaviorally (Ames et al., 2019; Elsayed et  
271 al., 2016; Haith et al., 2016; Haith and Bestmann, 2020; Kaufman et al., 2016; Lara et al., 2018).  
272 Movement preparation is often swift and consumes little time (Carlsen et al., 2008; Carlsen and  
273 MacKinnon, 2010; Lara et al., 2018; Wong et al., 2015) and it is not necessary for a go process to  
274 reach a fixed threshold level before a response is initiated (Jagadisan and Gandhi, 2017).

275 In light of our experimental results, the putative neural mechanisms thought to support  
276 reactive action inhibition may need to be revisited. In humans, reactive stopping behaviors are  
277 thought to be controlled through a particular prefrontal-cortex – basal-ganglia hyperdirect pathway.  
278 This pathway is thought to serve as an “emergency brake” that can abruptly abort a no-longer-

279 wanted response (Aron, 2007; Aron et al., 2014; Dunovan and Verstynen, 2016; Hannah and Aron,  
280 2021; Jahanshahi et al., 2015; Wessel and Aron, 2017; Wiecki and Frank, 2013). The special  
281 function has been often studied through the lens of stop-signal tasks and race models which, as we  
282 have argued, contain an embedded bias towards stopping being more urgent and, thus, faster than  
283 going. In some cases, circuits thought to be important for stopping have been found to be engaged  
284 during both response selection and production (Filevich et al., 2012; Mostofsky and Simmonds,  
285 2008). We suggest that to better understand the function of the hyperdirect pathway, it is critical  
286 to examine going and stopping under the same controlled experimental conditions as we have  
287 shown here.

288 In summary, we demonstrate that cancelling an impending response is not any faster than  
289 initiating a response. This challenges prevailing beliefs that the ability to prevent oneself from  
290 initiating an action has a privileged status and dedicated neural mechanisms. Instead, we propose  
291 a more parsimonious explanation that the ability to cancel an intended response may reflect a more  
292 general decision making about whether to act or not. This parsimonious explanation extends the  
293 recent finding in reactive tasks that deciding when and how to act are independent of one another,  
294 by adding a third component as whether or not to act in defining our behaviors. This parallels  
295 theories of volitional control which posits distinct “what”, “when” and “whether” decisions  
296 underlying self-generated intentional behavior (Brass and Haggard, 2008).

297

## 298 **Methods**

299 Participants: Thirty-six right-handed participants (15 female; 1 non-binary) between 18  
300 and 41 years of age took part in the study. The experimental procedure was approved by the Johns  
301 Hopkins School of Medicine Institutional Review Board. All participants gave written informed  
302 consent and received \$15 per hour for their participation. Data from one participant who did not  
303 follow the task instructions well were excluded from analyses (Fig. S1 and S2).

304 General procedures: Participants sat in front of a laptop with a gray screen and with a key  
305 pad next to it. The key pad was positioned so that participants could comfortably rest the index  
306 finger of their right hand on a mechanical key mounted on the key pad. On every trial, a white  
307 target line was placed with the same distance from the bottom of the screen and a circle was  
308 displayed at the top center of the screen (Fig. 1). Once the trial started, the circle moved downwards  
309 vertically and participants were asked to either press the key or do nothing when the moving circle

310 reached the target line. The circle stopped moving once a response was registered, or it kept  
311 moving toward the bottom of the screen.

312 For trials where a response was required, a red cross mark was shown if the circle did not  
313 intersect the line when it was stopped by a response or if the circle left the screen with no response  
314 having been generated, while a green check mark appeared if the circle intersected the target line  
315 when it was stopped by a response. The feedback was used to encourage participants to respond  
316 with accurate timing and minimize tendencies to delay their response in order to gain more time  
317 to make decisions. In trials in which no response was required, a green check mark was displayed  
318 if the circle left the screen without a response having been made, while a red cross was displayed  
319 if any response was generated at all. Whether or not a response was required in a given trial  
320 depended on the color of the circle (white or black). Since perceptual processing plays a critical  
321 role in motor response inhibition (Salinas and Stanford, 2013), we counterbalanced the association  
322 between response and the color of the moving stimulus so that for half of the participants, white  
323 color cued a response (i.e., press the key) and black color indicated that no response was needed  
324 (i.e., do not press the key), while this association was reversed for the other half participants, so as  
325 to control for the potential perceptual differences between black and white colors.

326 Criterion task: Before the experimental trials began, participants completed two criterion  
327 blocks. In these two blocks, all trials required a response in order for participants to become  
328 familiar with the timing requirement of the response. The meaning of the color used in this task  
329 was consistent with that used in subsequent tasks for each individual. In the first and easier  
330 criterion block, the moving circle started from the top center of the screen and dropped toward the  
331 bottom of the screen with a constant speed, which took 900 ms in total. A white target line was  
332 placed 750 ms from the top and thus 150 ms from the bottom. The circle diameter was sized such  
333 that it took 120 ms for the circle to move across the target line. The block ended with five  
334 consecutive correct responses (i.e., any part of the circle stopped on the line). Participants then  
335 performed the second and more difficult criterion block which matched the conditions of the main  
336 experiment, i.e., the diameter of the circle was reduced to 60 ms and it took 500 ms from the trial  
337 onset to the center of the circle intersecting the target line and another 120 ms to the bottom of the  
338 screen. Similarly, 5 consecutive correct trials were required to end this block.

339 After successfully completing these two criterion blocks, participants then performed the  
340 main task with a response-to-no response (R-to-NR) condition and a no response-to-response (NR-

341 to-R) condition, the order of which were counterbalanced across participants. Each condition  
342 consisted of 6 blocks and each block had 100 trials.

343 R-to-NR Condition: This task is also known as the adaptive stop-signal task (Coxon et al.,  
344 2006; Leunissen et al., 2017; Slater-Hammel, 1960) and has been used to examine how fast  
345 participants can decide to cancel a prepared response that was originally planned to be executed.  
346 The moving circle always started with the color that cued a response (white for half of participants  
347 and black for the other half). In a random ~30% of trials (204 out of 600 trials), the circle turned  
348 to the not-responding color while it was moving towards the target line. The time of color switch  
349 before the center of the circle intersected the target line was randomly drawn from a uniform  
350 distribution between 50ms to 450 ms with a step size of 16.7ms. The choice of this step size was  
351 constrained by the refresh rate of the monitor, which was 60 Hz. Thus, there were 28 possible time  
352 points at which the circle color changed. The closer the time point was from the target line, the  
353 shorter time available to make a decision.

354 NR-to-R Condition: This task, conceptually similar to the timed-response task commonly  
355 used in motor reaching task (Ghez et al., 1997; Haith et al., 2016), was used to examine how fast  
356 participant can initiate a response. Trials started with the circle defaulted to the not-responding  
357 color (white for half of participants and black for the other half) and switched to the responding  
358 color in a random subset of trials. Consistent with the R-to-NR condition, the proportion of color-  
359 switch trials was ~30% of trials (204 out of 600 trials) and the time of color change ranged from  
360 50 to 450 ms. These switch trials and their corresponding color change times were matched  
361 between these two conditions on a trial-by-trial basis. One participant showed clear evidence of  
362 guess the required response in the NR-to-R condition (Figs. S1 and S2) and we therefore excluded  
363 this participant from subsequent analysis.

#### 364 **Data analysis:**

365 Speed-accuracy trade-off: Our primary analysis was focused on the trials in which the  
366 color switched in both conditions. We assessed the time course over which participants were able  
367 to abort an impending action in the R-to-NR condition by constructing a speed-accuracy trade-off  
368 relating the time available to cancel a response and the probability of the response being  
369 successfully cancelled. For visualization purposes, we estimated this speed-accuracy trade-off  
370 using a 50 ms sliding window on the time available to cancel a response (i.e., forced RT, see below

371 for details). Similarly, the speed–accuracy trade-off can also reveal how rapidly a response can be  
372 initiated in the NR-to-R condition.

373 Response correctness: In our original speed–accuracy trade-off analysis (Fig. 2), a trial in  
374 which a response was required was considered to be successful only if a response was made while  
375 the circle was not below the target line (i.e., within a -30 ms time window below the target line).  
376 In practice, participants often did generate a response, but did so after the circle was no longer  
377 overlapping the line. We designated these trials as failures and considered them to be equivalent  
378 to not generating a response at all. However, we designated a trial that does not require a response  
379 as correct if participants did not press the button before the trial ended. This non-produced response  
380 may be more than 30 ms after the target line if it were generated.

381 This designation of correctness included a strong requirement of timing accuracy when  
382 initiating a response in the NR-to-R condition but not when cancelling a response in the R-to-NR  
383 condition (Fig. 2C). This asymmetry in the analysis may have affected our estimation of the  
384 relative timing of going and stopping. To match the timing requirement, we further used a -35 ms  
385 time window below the target line. Results from these two different criteria for correctness are  
386 consistent with one another (Fig. S3 and Main Text).

387 Forced RT: By manipulating the time at which circle changed its color (between 50 ms and  
388 450 ms before the targeted line), we forced participants to cancel an intended response in the R-  
389 to-NR condition or press a button in the NR-to-R condition within a particular amount of time,  
390 referred to as forced RT. In the R-to-NR condition, when participants failed to cancel an impending  
391 response, the forced RT was quantified as the time elapsed from color change to the time of the  
392 button press. When no response was generated, the actual forced RT was not observable and so  
393 instead the forced RT was approximated by the intended forced RT, i.e., the time interval between  
394 the center of the circle and the target line at the moment of color change. In the NR-to-R condition,  
395 the forced RT was calculated as the time interval between color change and the time of response  
396 if participants pressed a button before or when the circle reached the target line, whereas it was  
397 approximated as the interval between color change and the target line (i.e., intended forced RT) if  
398 participants did not generate a response or the response was made later than the target line (i.e.,  
399 the circle was no longer overlapping the target line).

400 When using the intended RT described above, we inherently assumed that the not-produced  
401 response would have had accurate timing, if it was produced, which, however, is not true in reality.

402 All participants had an idiosyncratic tendency to respond consistently earlier or later than the target  
 403 line (Fig. S4). To better approximate the true RT, we first calculated how much later or earlier  
 404 each participant responded to trials in non-switch trials in which the circle was in the responding  
 405 color throughout the trial (i.e., 396 out of 600 trials, about 70% in the R-to-NR condition). From  
 406 these measurements, we randomly drew a sample and added it to an intended RT to approximate  
 407 the unobservable true forced RT. We repeated this bootstrapping process 1000 times for each  
 408 individual and modelled the mean speed–accuracy trade-off.

409 Modelling speed–accuracy trade-off: To quantify the speed–accuracy trade-off, we  
 410 assumed that cancelling an intended response in the R-to-NR condition occurred at a random time  
 411  $T_{NR} \sim \mathcal{N}(\mu_{NR}, \sigma_{NR}^2)$ . A response would be correctly aborted with probability  $\beta_{NR}$  (close to 1) if  
 412 forced RT was long than  $T_{NR}$  and with a probability  $\alpha_{NR}$  (close to 0) if the available forced RT  
 413 was shorter than  $T_{NR}$ . Thus, the probability, in trial  $i$ , of observing a correct response cancellation  
 414 ( $c = 1$ ), given the preparation time ( $t^i$ ) is given by:

$$415 \quad p_{NR}(c^i | t^i) = \alpha_{NR} p(t^i \leq T_{NR}) + \beta_{NR} p(t^i > T_{NR})$$

$$416 \quad = \alpha_{NR} (1 - \Phi_{NR}(t^i | \mu_{NR}, \sigma_{NR}^2)) + \beta_{NR} \Phi_{NR}(t^i | \mu_{NR}, \sigma_{NR}^2)$$

417 where  $\Phi_{NR}(t^i | \mu_{NR}, \sigma_{NR}^2)$  is the cumulative normal distribution of  $T_{NR}$ .

418 Similarly, in the NR-to-R condition, the probability of correctly initiating a response given  
 419 the preparation time ( $t^i$ ) is:

$$420 \quad p_R(c^i | t^i) = \alpha_R p(t^i \leq T_R) + \beta_R p(t^i > T_R) = \alpha_R (1 - \Phi_R(t^i)) + \beta_R \Phi_R(t^i)$$

421 where  $\Phi_R(t^i) = \Phi_R(t^i | \mu_R, \sigma_R^2)$  is the cumulative normal distribution of  $T_R$ .

422 We estimated the parameters using maximum likelihood estimation with the MATLAB  
 423 function `fmincon`.

424 Modelling time of response: Time of response was the time elapsed from the trial onset to  
 425 the time at which the response was made, if any. In our speed–accuracy trade-off analysis, we  
 426 relied on a proxy RT for trials in which a response was not produced. To avoid this reliance, we  
 427 also estimated the speed of making a response in the NR-to-R condition by fitting the time of  
 428 response,  $y$ , with two linear functions, which intersected at an intended forced RT of  $\mu_T$ :

$$429 \quad y = \begin{cases} \mu_0 + \beta_1(t - \mu_T) + \mathcal{M}(0, \sigma_{rt}^2, \delta), & t < \mu_T \\ \mu_0 + \beta_2(t - \mu_T) + \mathcal{N}(0, \sigma_r^2), & t \geq \mu_T \end{cases}$$

430 In this model, we took the time of transition between these components,  $\mu_T$ , as the  
431 minimum time at which participants could initiate a response on time following the color change.  
432 At  $\mu_T$ , a response needed to be made without any delay so that it could land on the target line.  $\mu_0$   
433 is the time of response when  $t = \mu_T$ . We assumed that for  $t < \mu_T$ , participants behaved in a  
434 reactive manner to the appearance of stimulus and that, therefore, the time of response would  
435 follow a typical reaction time distribution. In particular, we observed that some participants  
436 occasionally generated times of response that were longer than most of their responses, so we  
437 assumed that the residual term in the upper equation followed an exponentially modified Gaussian  
438 distribution  $\mathcal{M}(0, \sigma_{rt}^2, \delta)$ . This choice did not lose its generality if participants did not generate  
439 some uncommon late responses, because when  $\delta$  is close to zero,  $\mathcal{M}$  approaches to be a Gaussian  
440 distribution. When  $t \geq \mu_T$ , participants would time the response and press the button at around the  
441 target line. Thus, we assumed that residual term of the lower equation in this case followed a  
442 Gaussian distribution  $\mathcal{N}(0, \sigma_r^2)$ . Parameters  $\mu_0, \beta_1, \beta_2, \mu_T, \sigma_{rt}, \sigma_r, \delta$ , were estimated by  
443 maximum likelihood estimation with MATLAB function `fmincon`. To avoid a local minimum  
444 estimation, we ran the maximum likelihood estimation with 100 random starting values. A  
445 parameter recovery analysis indicated that our model fitting yielded unreliable estimation of true  
446 parameters (Fig. S5). We found, based on parameter recovery, that it was better to constrain  $\sigma_{rt}$  to  
447 be greater than 0 (lower bound of 0.005), in order to avoid poor quality fits. For the same reason,  
448 we also regularized the fits by penalizing the log-likelihood with:

$$LL^* = LL - \gamma(\sigma_{rt} - 0.03)^2 - \gamma(\delta - 0.03)^2 - \gamma(\mu_0 - 0.5)^2$$

449  $\sigma_{rt}$  and  $\delta$  were included to avoid unrealistic estimation of  $\sigma_{rt} \approx 0$  and  $\delta \approx 0$  (Fig. S5). We chose  
450 0.03 for  $\sigma_{rt}$  and  $\delta$  as it was the mean value of initial estimation across participants. We also  
451 regularized  $\mu_0$  and set it to 0.5 s because our data showed that participants tended to respond  
452 around the target line given a long enough RT (Fig. S4). We set  $\gamma = 2000$ , which avoided  
453 overfitting these three parameters to the particular value we selected. Parameter recovery  
454 demonstrated that this regularized fitting procedure led to reliable estimation of the true parameters  
455 when applied to synthetic data (Fig. S6).

457 Statistical analysis: Data (e.g.,  $\mu_{NR}$  vs.  $\mu_R$ ) were analyzed using paired t-test at the  
458 significant level of  $\alpha = 0.05$  after examining the normality of samples. Because non-significant  
459 outcomes from hypothesis testing does not necessarily mean two samples are not different from  
460 one another, we further conducted the equivalence and noninferiority test (Lakens, 2017; Walker



461 and Nowacki, 2011). Power analysis indicates that the sample size  $n = 35$  (out of 36) had 80%  
462 power to detect an effect size of 0.7 between conditions (Lakens, 2017). Therefore, we set the  
463 upper and lower bounds of the equivalence and noninferiority test as 0.7 and -0.7, corresponding  
464 to the equivalence bound between 16.5 ms and -16.5 ms in the unit of reaction time.

465

466

467

#### 468 **Author Contributions**

469 Y.D., A.D.F., and A.M.H. conceptualized the experiment; A.D.F. programmed the task;  
470 Y.D., A.D.F., and D.M.M. collected data; Y.D. performed data and statistical analyses; Y.D.  
471 prepared the figures; Y.D. drafted the manuscript; Y.D., A.D.F., D.M.M., and A.M.H. revised the  
472 manuscript and approved final version of the manuscript.

473

474

#### 475 **Competing Interests**

476 The authors declare no competing interests.

477

478

479

480

481

#### 482 **References**

483

484 Ames KC, Ryu SI, Shenoy KV. 2019. Simultaneous motor preparation and execution in a last-  
485 moment reach correction task. *Nature communications* **10**:1–13.

486 Aron AR. 2007. The neural basis of inhibition in cognitive control. *The neuroscientist* **13**:214–  
487 228.

488 Aron AR, Robbins TW, Poldrack RA. 2014. Inhibition and the right inferior frontal cortex: one  
489 decade on. *Trends in cognitive sciences* **18**:177–185.

490 Boucher L, Palmeri TJ, Logan GD, Schall JD. 2007. Inhibitory control in mind and brain: an  
491 interactive race model of countermanding saccades. *Psychological review* **114**:376–397.

492 Brass M, Haggard P. 2008. The what, when, whether model of intentional action. *The*  
493 *Neuroscientist* **14**:319–325.

494 Carlsen AN, Chua R, Inglis JT, Sanderson DJ, Franks IM. 2008. Motor preparation in an  
495 anticipation-timing task. *Experimental brain research* **190**:453–461.

496 Carlsen AN, Chua R, Inglis JT, Sanderson DJ, Franks IM. 2004. Prepared movements are  
497 elicited early by startle. *Journal of motor behavior* **36**:253–264.

498 Carlsen AN, MacKinnon CD. 2010. Motor preparation is modulated by the resolution of the  
499 response timing information. *Brain research* **1322**:38–49.

500 Corneil BD, Cheng JC, Goonetilleke SC. 2013. Dynamic and opposing adjustment of movement  
501 cancellation and generation in an oculomotor countermanding task. *Journal of*  
502 *Neuroscience* **33**:9975–9984.

- 503 Coxon JP, Stinear CM, Byblow WD. 2006. Intracortical inhibition during volitional inhibition of  
504 prepared action. *Journal of neurophysiology* **95**:3371–3383.
- 505 Dunovan K, Lynch B, Molesworth T, Verstynen T. 2015. Competing basal ganglia pathways  
506 determine the difference between stopping and deciding not to go. *Elife* **4**:e08723.
- 507 Dunovan K, Verstynen T. 2016. Believer-skeptic meets actor-critic: rethinking the role of basal  
508 ganglia pathways during decision-making and reinforcement learning. *Frontiers in*  
509 *neuroscience* **10**:106.
- 510 Elsayed GF, Lara AH, Kaufman MT, Churchland MM, Cunningham JP. 2016. Reorganization  
511 between preparatory and movement population responses in motor cortex. *Nature*  
512 *communications* **7**:1–15.
- 513 Filevich E, Kühn S, Haggard P. 2012. Negative motor phenomena in cortical stimulation:  
514 implications for inhibitory control of human action. *cortex* **48**:1251–1261.
- 515 Ghez C, Favilla M, Ghilardi MF, Gordon J, Bermejo R, Pullman S. 1997. Discrete and  
516 continuous planning of hand movements and isometric force trajectories. *Experimental*  
517 *Brain Research* **115**:217–233.
- 518 Gulberti A, Arndt P, Colonius H. 2014. Stopping eyes and hands: evidence for non-  
519 independence of stop and go processes and for a separation of central and peripheral  
520 inhibition. *Frontiers in human neuroscience* **8**:61.
- 521 Haggard P. 2008. Human volition: towards a neuroscience of will. *Nature Reviews Neuroscience*  
522 **9**:934–946.
- 523 Haith AM, Bestmann S. 2020. Preparation of movement In: Poeppel D, Mangun G, Gazzaniga  
524 M, editors. *The Cognitive Neurosciences*. MIT Press.
- 525 Haith AM, Pakpoor J, Krakauer JW. 2016. Independence of movement preparation and  
526 movement initiation. *Journal of Neuroscience* **36**:3007–3015.
- 527 Hannah R, Aron AR. 2021. Towards real-world generalizability of a circuit for action-stopping.  
528 *Nature Reviews Neuroscience* **22**:538–552.
- 529 He JL, Hirst RJ, Puri R, Coxon J, Byblow W, Hinder M, Skippen P, Matzke D, Heathcote A,  
530 Wadsley CG. 2021. OSARI, an Open-Source Anticipated Response Inhibition Task.  
531 *Behavior research methods* 1–11.
- 532 Jagadisan UK, Gandhi NJ. 2017. Removal of inhibition uncovers latent movement potential  
533 during preparation. *Elife* **6**:e29648.
- 534 Jahanshahi M, Obeso I, Rothwell JC, Obeso JA. 2015. A fronto–striato–subthalamic–pallidal  
535 network for goal-directed and habitual inhibition. *Nature Reviews Neuroscience* **16**:719–  
536 732.
- 537 Kaufman MT, Seely JS, Sussillo D, Ryu SI, Shenoy KV, Churchland MM. 2016. The largest  
538 response component in the motor cortex reflects movement timing but not movement  
539 type. *ENeuro* **3**.
- 540 Lakens D. 2017. Equivalence tests: A practical primer for t tests, correlations, and meta-analyses.  
541 *Social psychological and personality science* **8**:355–362.
- 542 Lara AH, Elsayed GF, Zimmnik AJ, Cunningham JP, Churchland MM. 2018. Conservation of  
543 preparatory neural events in monkey motor cortex regardless of how movement is  
544 initiated. *Elife* **7**:e31826.
- 545 Leotti LA, Wager TD. 2010. Motivational influences on response inhibition measures. *Journal of*  
546 *Experimental Psychology: Human Perception and Performance* **36**:430–447.

- 547 Leunissen I, Zandbelt BB, Potocanac Z, Swinnen SP, Coxon JP. 2017. Reliable estimation of  
548 inhibitory efficiency: to anticipate, choose or simply react? *European Journal of*  
549 *Neuroscience* **45**:1512–1523.
- 550 Logan GD, Cowan WB. 1984. On the ability to inhibit thought and action: A theory of an act of  
551 control. *Psychological review* **91**:295–327.
- 552 Luce RD. 1991. Response times: Their role in inferring elementary mental organization. Oxford  
553 University Press, USA.
- 554 MacLeod CM, Dodd MD, Sheard ED, Wilson DE, Bibi U. 2003. In opposition to inhibition.  
555 Matzke D, Strickland LJG, Sripada C, Weigard AS, Puri R, He J, Hirst R, Heathcote A. 2021.  
556 Stopping timed actions. *PsyArXiv*. doi:<https://doi.org/10.31234/osf.io/9h3v7>
- 557 Mostofsky SH, Simmonds DJ. 2008. Response inhibition and response selection: two sides of the  
558 same coin. *Journal of cognitive neuroscience* **20**:751–761.
- 559 Özyurt J, Colonius H, Arndt PA. 2003. Countermanding saccades: evidence against independent  
560 processing of go and stop signals. *Perception & Psychophysics* **65**:420–428.
- 561 Rawji V, Modi S, Rocchi L, Jahanshahi M, Rothwel J. 2022. Proactive inhibition is marked by  
562 differences in the pattern of motor cortex activity during movement preparation and  
563 execution. *Journal of Neurophysiology* 819–828.
- 564 Salinas E, Stanford TR. 2013. The countermanding task revisited: fast stimulus detection is a key  
565 determinant of psychophysical performance. *Journal of Neuroscience* **33**:5668–5685.
- 566 Slater-Hammel AT. 1960. Reliability, accuracy, and refractoriness of a transit reaction. *Research*  
567 *Quarterly American Association for Health, Physical Education and Recreation* **31**:217–  
568 228.
- 569 Valls-Solé J, Solé A, Valldeoriola F, Muñoz E, Gonzalez LE, Tolosa ES. 1995. Reaction time  
570 and acoustic startle in normal human subjects. *Neuroscience letters* **195**:97–100.
- 571 Verbruggen F, Aron AR, Band GP, Beste C, Bissett PG, Brockett AT, Brown JW, Chamberlain  
572 SR, Chambers CD, Colonius H. 2019. A consensus guide to capturing the ability to  
573 inhibit actions and impulsive behaviors in the stop-signal task. *Elife* **8**:e46323.
- 574 Walker E, Nowacki AS. 2011. Understanding equivalence and noninferiority testing. *Journal of*  
575 *general internal medicine* **26**:192–196.
- 576 Welford A. 1980. Choice reaction time: Basic concepts. *Reaction times* 73–128.
- 577 Wessel JR, Aron AR. 2017. On the globality of motor suppression: unexpected events and their  
578 influence on behavior and cognition. *Neuron* **93**:259–280.
- 579 Wiecki TV, Frank MJ. 2013. A computational model of inhibitory control in frontal cortex and  
580 basal ganglia. *Psychological review* **120**:329–355.
- 581 Wong AL, Haith AM, Krakauer JW. 2015. Motor planning. *The Neuroscientist* **21**:385–398.

582  
583  
584  
585  
586  
587  
588  
589  
590  
591  
592

**Supplement Figures:**

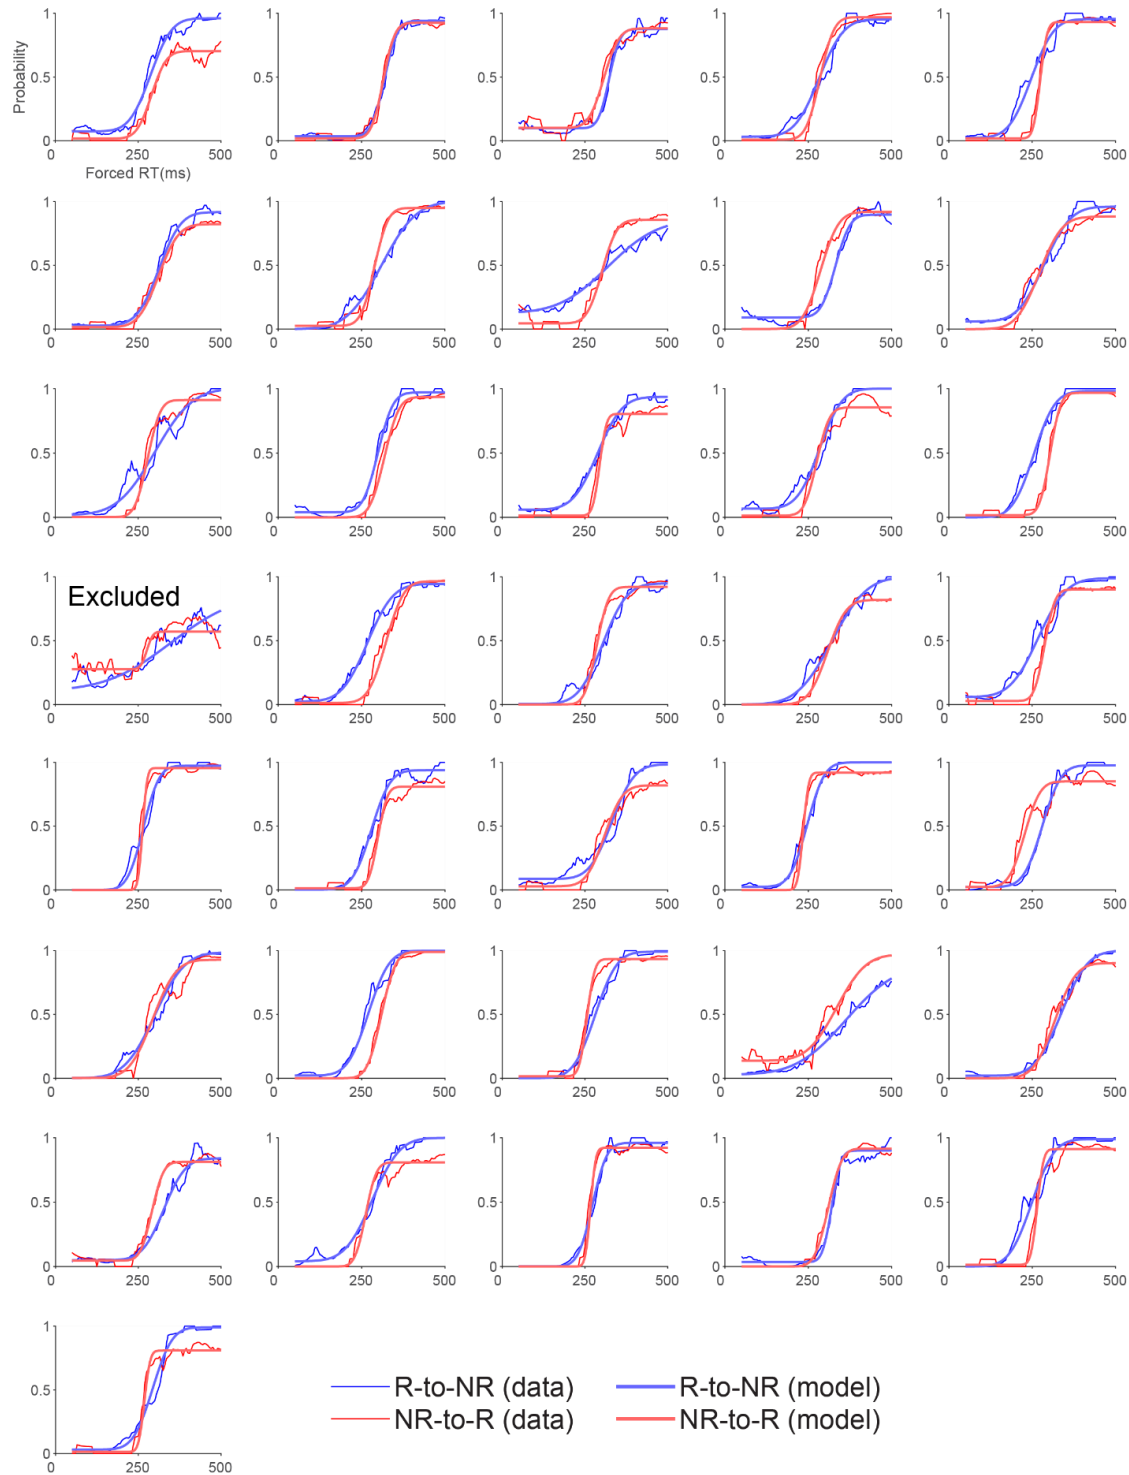

593  
594  
595  
596  
597  
598  
599

**Fig. S1. Speed-accuracy trade-off for each individual.** Most participants' performance (thinner lines) was similar to the exemplar participant shown in Fig. 2. The accuracy was close to zero when forced RT was very short (i.e., < 100 ms) and it increased with longer forced RT. However, one participant exhibited abnormally high accuracy even when forced RT was less than 100 ms, suggesting that this particular participant randomly guessed whether to initiate or cancel a response instead of following the instruction for each condition. We excluded this participant from further analysis.

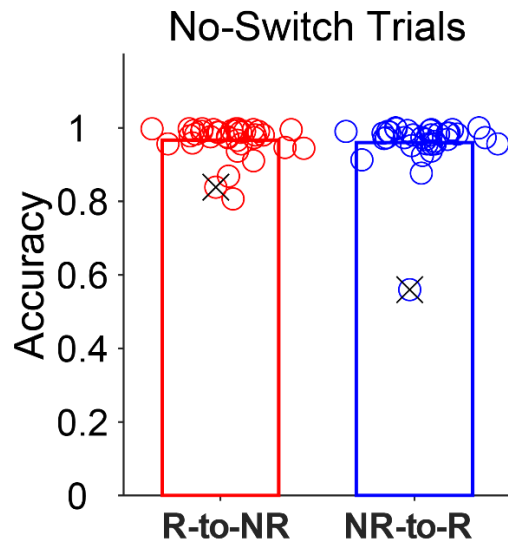

600 **Fig. S2. Response correctness in trials that stimulus circle did not change color.** The high accuracy in  
601 no-switch trials (i.e., Making a response in the R-to-NR condition or not making a response in the NR-to-  
602 R condition) revealed that participants did not behave randomly except one participant, who exhibited a  
603 chance-level performance in the NR-to-R condition. This participant was the one who also produced higher  
604 accuracy in switch trials even when forced RT was very short shown in Fig. S1. Since we aimed to  
605 compared the individual-wise performance between two tasks, this participant's data from both conditions  
606 (crossed circles) were excluded for our analyses reported in main texts.  
607  
608

609

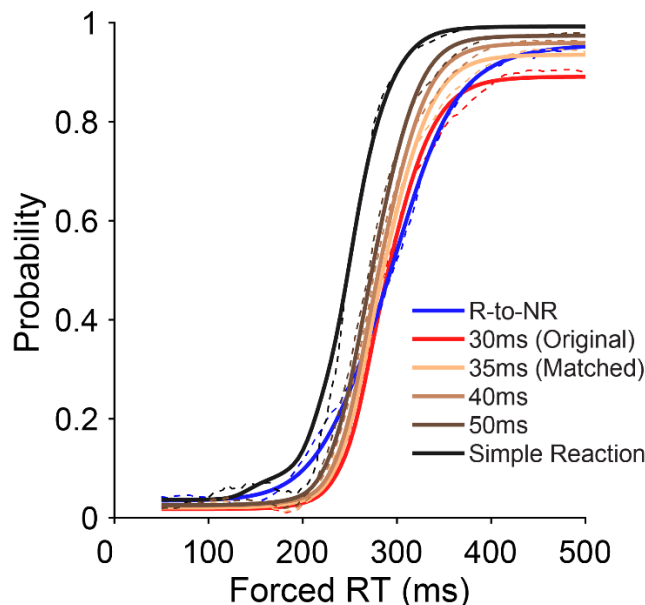

610 **Fig. S3. The effect of correctness criterion on the estimated speed of response initiation.** A)  
611 The shape of the speed-accuracy trade-off in the NR-to-R condition depended on how we defined a correct  
612 responding trial. The original tolerance was 30ms (i.e., a half size of the stimulus circle). Correctness  
613 defined on this small-time window did not include trials where a response was made 30 ms or more later  
614 below the target line, resulting in a lower accuracy in the NR-to-R condition than the R-to-NR condition  
615 when RT was long enough (red vs. blue). To match accuracy rates across conditions, we instead used a  
616

617 timing tolerance of 35 ms that yielded a similar accuracy level between conditions for trials with long RT  
618 (light brown). In this case, we still found that the timing of response cancellation was not different from the  
619 timing of response generation (blue vs. light brown). In addition, the original estimation of response  
620 initiation speed was around 285 ms. This slow speed was, at least partially, caused by the timing  
621 requirement of initiating a response on time in the NR-to-R condition. Further broadening timing tolerances  
622 from 35 ms to 50 ms led to superior speed–accuracy trade-offs with faster mean speeds of responding than  
623 the original (brown lines). The speed was even faster ( $248.7 \text{ ms} \pm 31.7 \text{ ms}$ ) when all trials with a response  
624 at any time were considered correct (the 'simple reaction' mode; black line). Solid lines: model fitting;  
625 Dashed lines: data.  
626  
627  
628

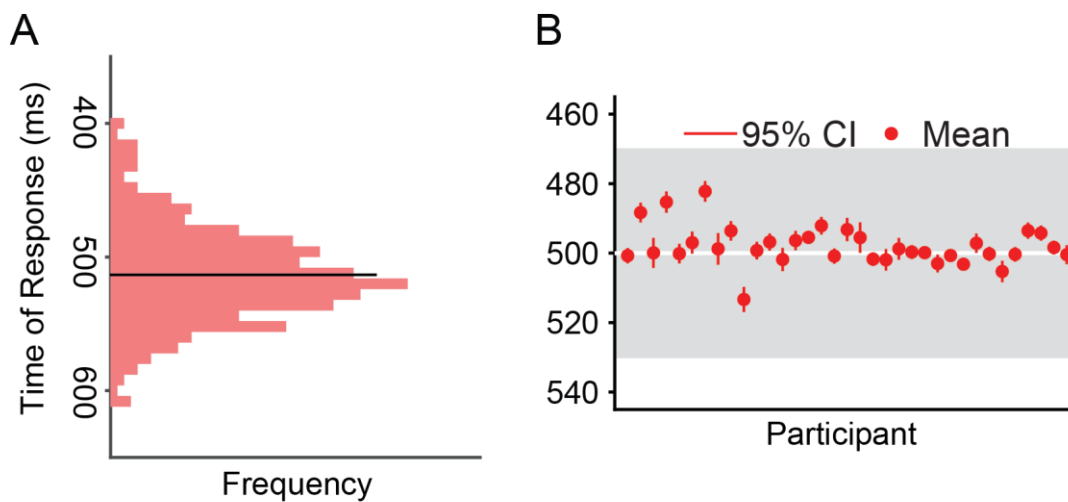

629  
630 **Fig. S4. Idiosyncratic tendencies to respond consistently earlier or later than the target line.**  
631 A) Data from the same exemplar participant as in Fig. 2B. The time of response, measured for trials that  
632 the circle started and stayed as the same color that required a response in the R-to-NR condition, was  
633 calculated as the time interval between trial onset and the time at which a response was made. This  
634 participant tended to respond consistently slightly later than the target line (i.e., 500 ms). B) The mean  
635 time of response for each individual participant. All participants had an idiosyncratic tendency to respond  
636 consistently earlier or later than the target line, although the circle still overlapped the target line when they  
637 responded (grey area representing the diameter of 60 ms of the circle).  
638  
639

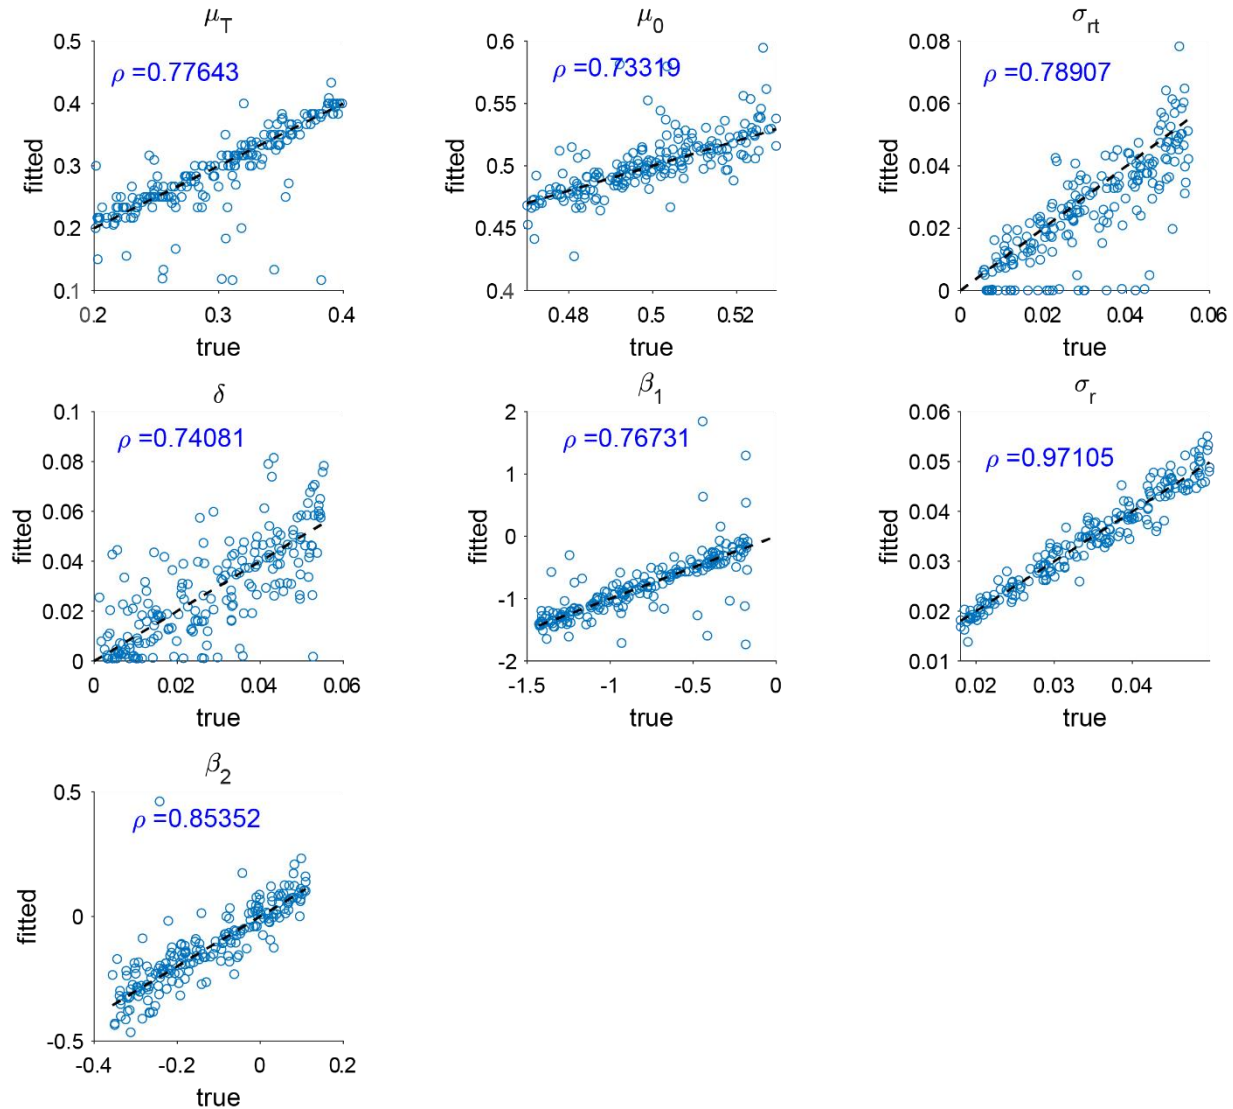

640  
641 **Fig. S5. Parameter recovery of the model used to fit time of response data without regularization**  
642 **terms.** We used the model to generated synthetic datasets matching the amount of data collected from each  
643 participant. We generated datasets based on a range of true underlying parameter values and then used  
644 maximum likelihood estimation to try to recover the true underlying parameters. Each panel shows a  
645 different parameter (unit of measurement: second), with true value used in the simulation on the x-axis and  
646 the estimated value on the y-axis. For most parameters, including the key parameter of interest,  $\mu_T$ ,  
647 parameter recovery was not accurate.

648  
649

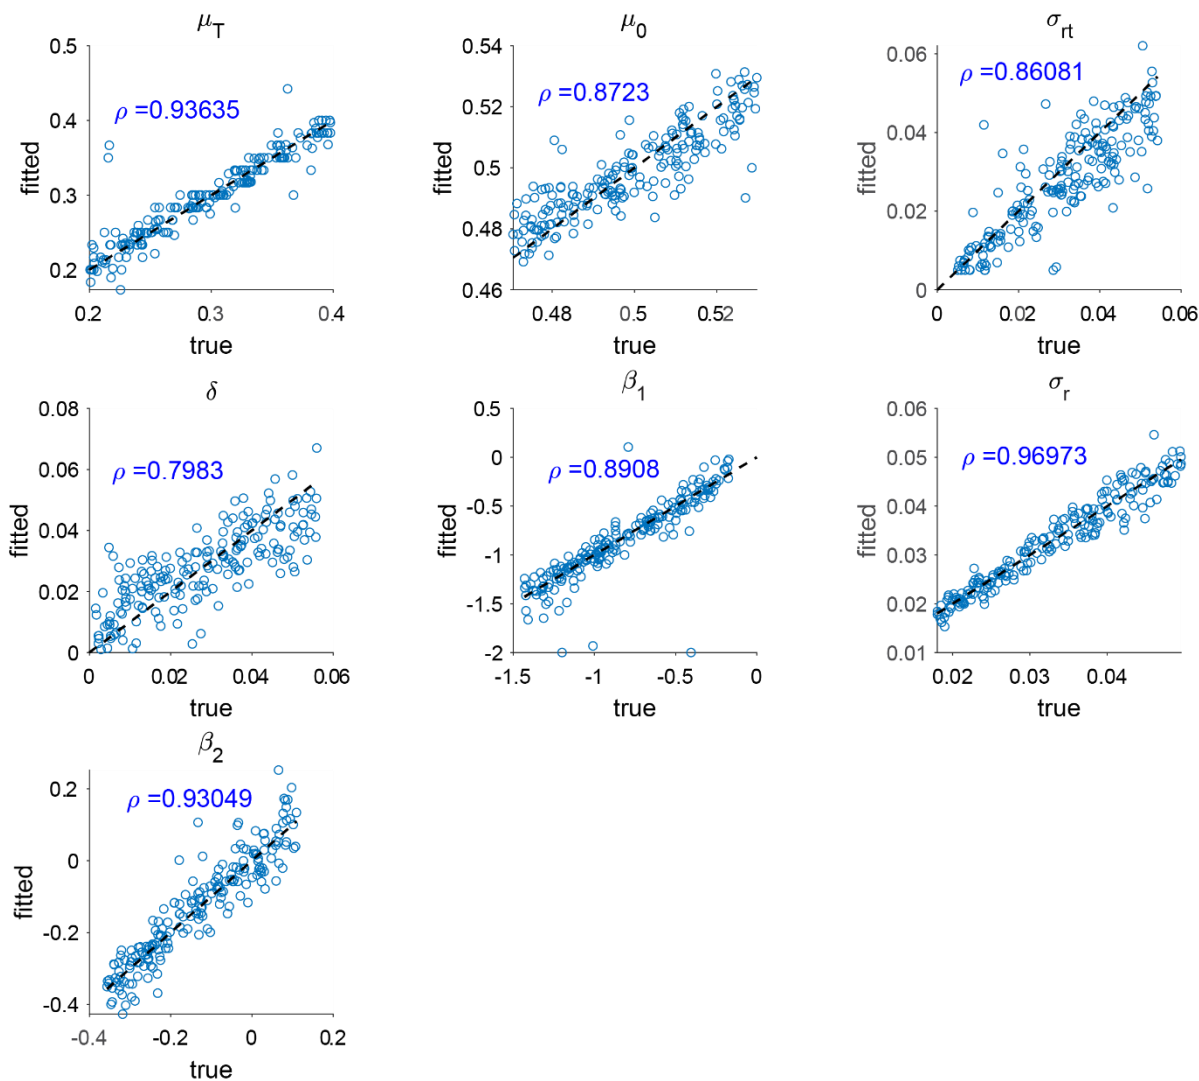

650  
651 **Fig. S6. Parameter recovery of the model used to fit time of response data with regularization terms.**  
652 After adding regularization terms with respect to  $\mu_0$ ,  $\sigma_{rt}$ , and  $\delta$ , the reliability of the parameter  
653 estimation became notably improved. The correlation between true values and estimated values of  
654  $\mu_T = 0.94$ , which is much higher than the corresponding value of 0.78 in the model without  
655 regularization (Fig. S5).  
656
